# Supplementary material
Source: PubMed Central journal article supplement (PMC327178)
Supplement: pnas_2534828100_8.pdf [file pnas_2534828100_8.pdf]

Table 1. Structural properties of the studied homodimers.

|                    | Name                               | PDB code | # residue per monomer | Linker length (# Gly) | Monomeric native contacts | Interfacial native contacts |
|--------------------|------------------------------------|----------|-----------------------|-----------------------|---------------------------|-----------------------------|
| Two-state dimers   | Troponin C site                    | 1cta     | 34                    | 7                     | 43                        | 50                          |
|                    | Arc repressor                      | 1arr     | 53                    | 18                    | 57                        | 135                         |
|                    | Gene V protein                     | 2gvb     | 87                    | 10                    | 198                       | 69                          |
|                    | Factor for inversion stimulation   | 1f36     | 89                    | 12                    | 141                       | 156                         |
|                    | $\beta$ nerve growth factor        | 1bet     | 107                   | 10                    | 253                       | 113                         |
| Three-state dimers | Lamda repressor                    | 1lmb     | 87                    | 15                    | 192                       | 52                          |
|                    | Lambda Cro repressor               | 1cop     | 66                    | 12, 20, 30            | 121                       | 57                          |
|                    | LFB1 transcription factor          | 1lfb     | 77                    | 12                    | 150                       | 46                          |
|                    | Streptomyces subtilisim inhibition | 3ssi     | 108                   | 10                    | 278                       | 75                          |
|                    | Superoxide dismutase               | 1xso     | 150                   | 18                    | 454                       | 59                          |
|                    | Trp repressor*                     | 2wrp     | 101                   | 12                    | 155                       | 156                         |

\* Trp repressor is a three-state homodimer where a dimeric conformation constitutes the intermediate state and no folded monomer is detected.
