# Supplementary material
Source: PubMed Central journal article supplement (PMC327178)

Linker of 12 Gly

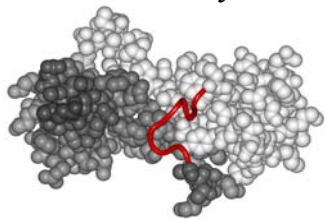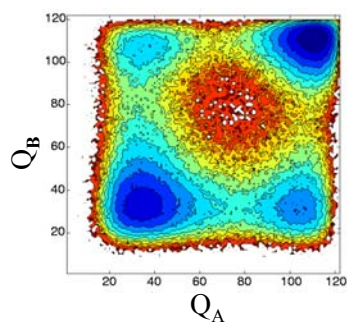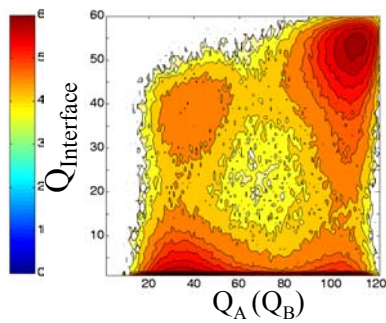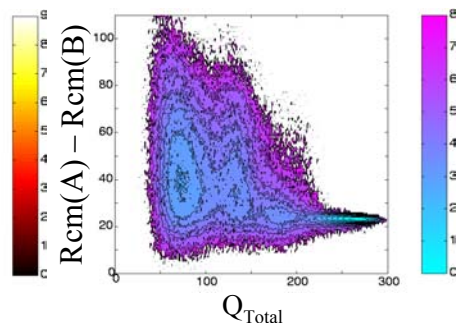

Linker of 20 Gly

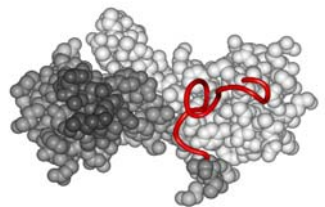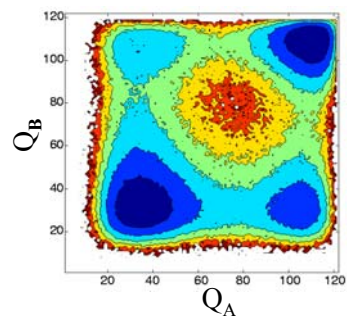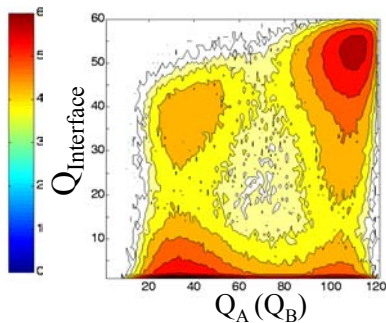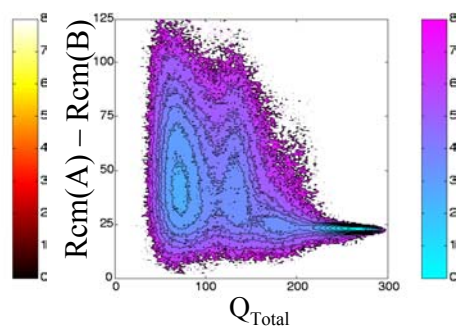

Linker of 30 Gly

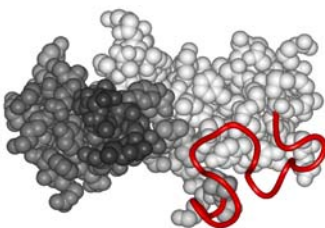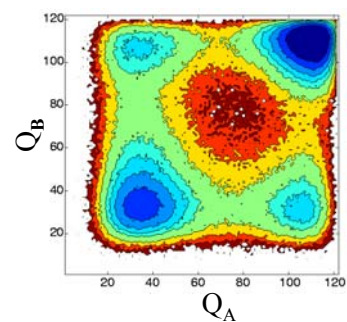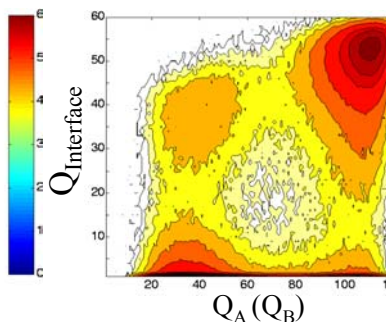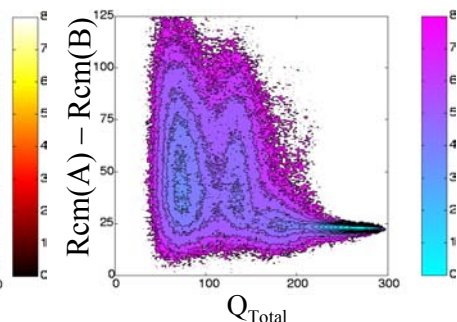

Without a linker

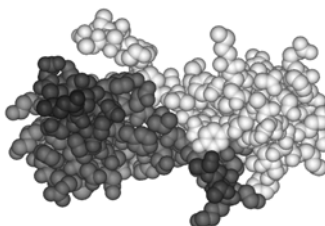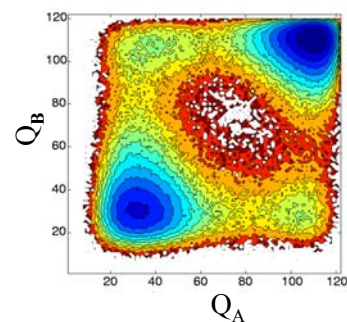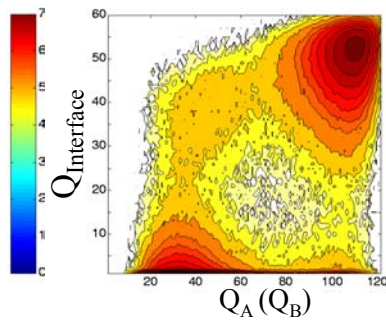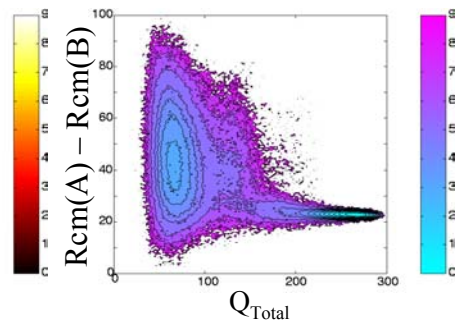

Supplement: pnas_2534828100_3.pdf [file pnas_2534828100_3.pdf]

Linker of 12 Gly

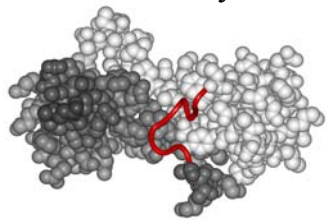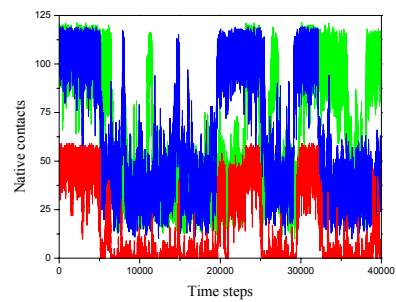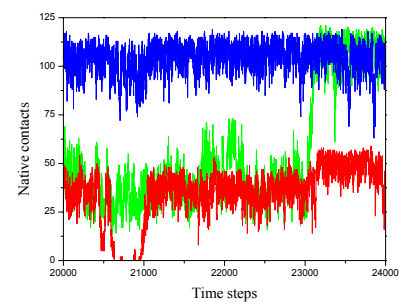

Linker of 20 Gly

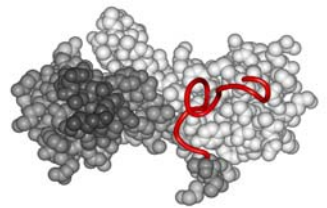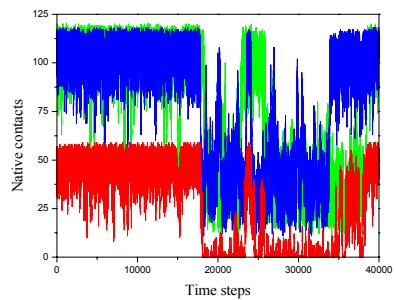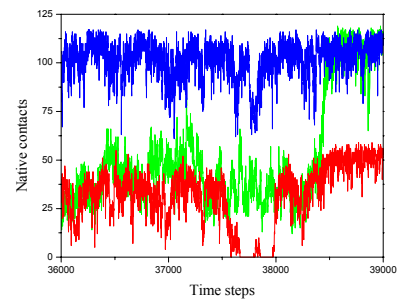

Linker of 30 Gly

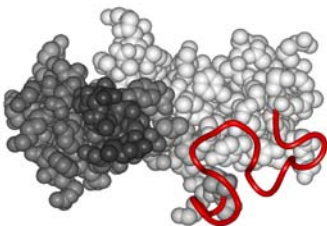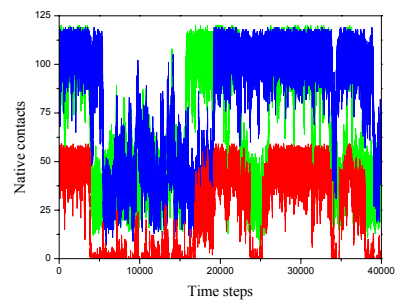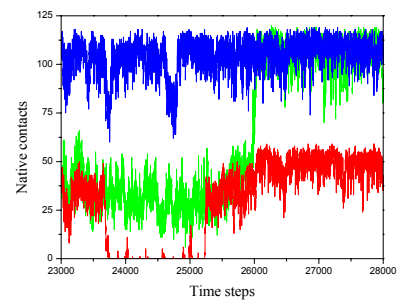

Without a linker

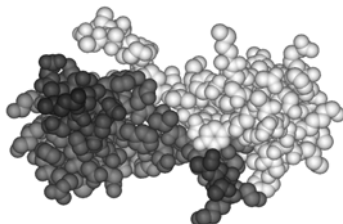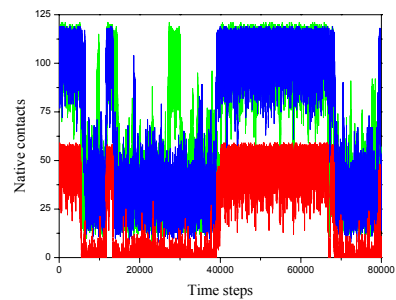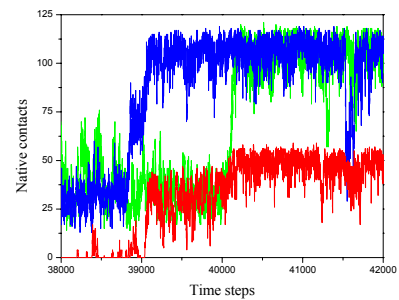

Supplement: pnas_2534828100_5.pdf [file pnas_2534828100_5.pdf]

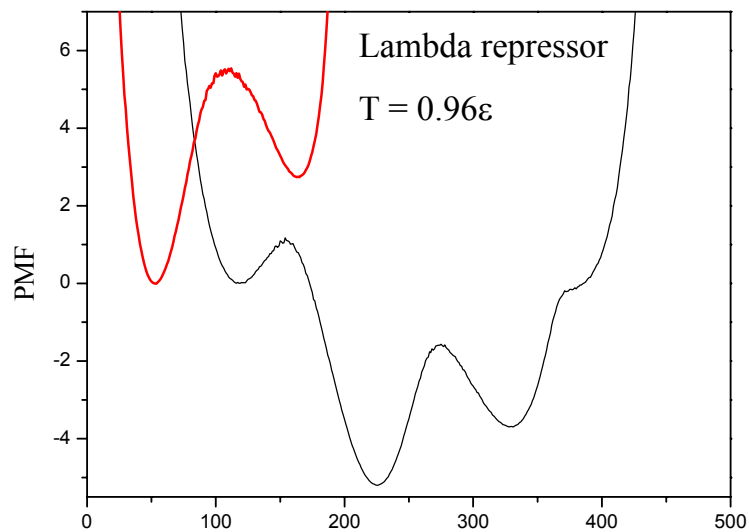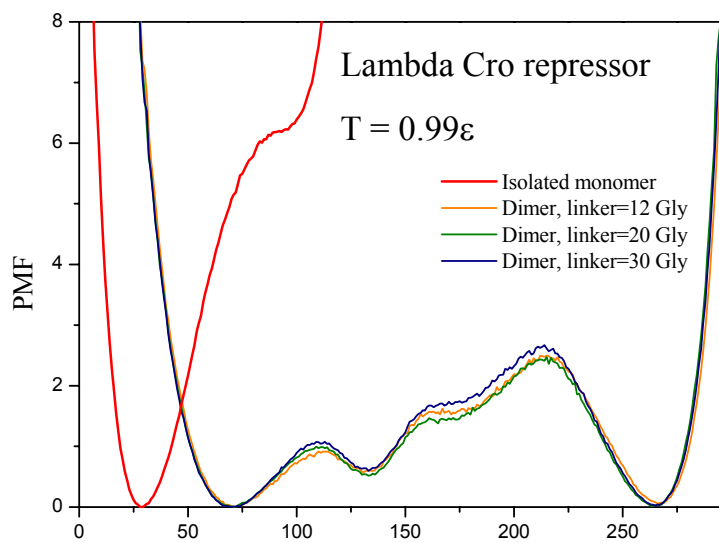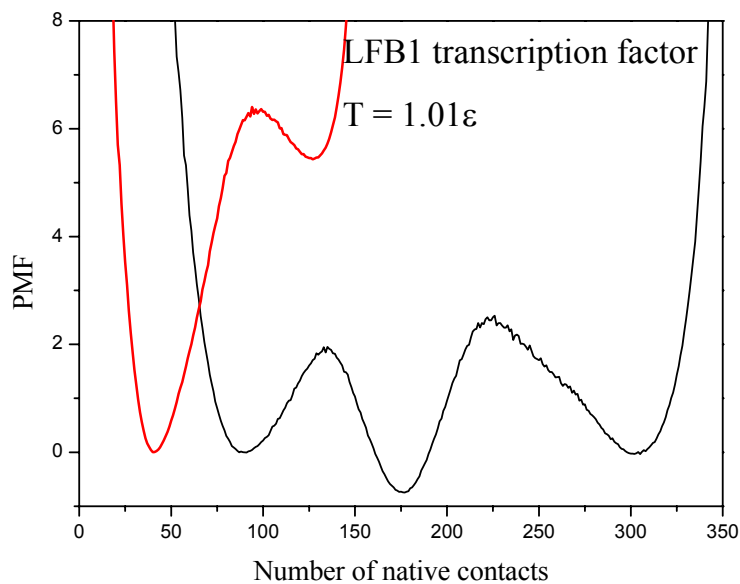

Supplement: pnas_2534828100_7.pdf [file pnas_2534828100_7.pdf]
